# Supplementary material for: Surgical and perioperative management of flail chest with titanium plates: a French cohort series from a thoracic referral center
Source: PubMed Central journal article supplement (PMC9850677; doi:10.1186/s13019-023-02121-8), 2023-01-18
Supplement: 13019_2023_2121_MOESM1_ESM.pdf [file 13019_2023_2121_MOESM1_ESM.pdf]

**Table S1. Thoracic Trauma Severity Score**

| PaO <sub>2</sub> /FiO <sub>2</sub> (mmHg) | Rib fracture      | Contusion                                 | Pleural involvement                          | Age (years) | Points |
|-------------------------------------------|-------------------|-------------------------------------------|----------------------------------------------|-------------|--------|
| >400                                      | 0                 | None                                      | None                                         | <30         | 0      |
| 300-400                                   | 1-3               | 1 lobe                                    | Pneumothorax                                 | 30-41       | 1      |
| 200-300                                   | 4-6<br>Unilateral | 1 lobe bilateral<br>or 2 lobes unilateral | Unilateral hemothorax<br>Or hemopneumothorax | 42-54       | 2      |
| 150-200                                   | >3<br>Bilateral   | < 2 lobes bilateral                       | Bilateral hemothorax<br>Or hemopneumothorax  | 55-70       | 3      |
| <150                                      | Flail chest       | ≥ 2 lobes bilateral                       | Tension pneumothorax                         | >70         | 5      |

**Table S2. Descriptive table of associated extra thoracic lesions.**

| Localisation  | Injury description                                                                                                                                                                                                                             | Number of patients concern                                   |
|---------------|------------------------------------------------------------------------------------------------------------------------------------------------------------------------------------------------------------------------------------------------|--------------------------------------------------------------|
| Head and neck | <ul style="list-style-type: none"> <li>• Non-displaced fracture of C2</li> <li>• Minor subarachnoidal hemorrhage</li> <li>• Minor intraparenchymal haemorrhage</li> <li>• Traumatic injury of the Petrous part of the Temporal Bone</li> </ul> | 2                                                            |
| Face          | <ul style="list-style-type: none"> <li>• Traumatic orbital apex syndrome</li> <li>• Nose fracture</li> <li>• Complex facial trauma</li> </ul>                                                                                                  | 4 (2 of which requiring surgery)                             |
| Extremities   | <ul style="list-style-type: none"> <li>• Upper limb fracture (Humeral, Forearm)</li> <li>• Pelvic fracture</li> <li>• Lower limb fracture (femur, leg, ankle)</li> </ul>                                                                       | 5 (3 of which requiring surgery)                             |
| Abdomen       | <ul style="list-style-type: none"> <li>• Spleen laceration</li> <li>• Spleen fracture (needing embolisation)</li> <li>• Subcapsular renal hematoma</li> </ul>                                                                                  | 3                                                            |
| Spine         | <ul style="list-style-type: none"> <li>• Fracture in the lumbar and thoracic vertebrae</li> </ul>                                                                                                                                              | 3 (2 of which requiring surgical or radiological procedures) |

Number of patients with associated extrathoracic trauma n = 17

**Table S3. Summary of characteristics and outcomes of patients treated with rib fixation in different recent series**

|                                                          | Tanaka et al                | Grenetzy et al              | Marasco et al                       | Féray et al                        |
|----------------------------------------------------------|-----------------------------|-----------------------------|-------------------------------------|------------------------------------|
| Year of publication                                      | 2002                        | 2005                        | 2013                                | 2019                               |
| Country                                                  | Japan                       | Egypt                       | Australia                           | France                             |
| Study type                                               | Randomized controlled trial | Randomized controlled trial | Randomized controlled trial         | Retrospective observational cohort |
| Number of operated/non operated patients                 | 18/37                       | 20/40                       | 23/46                               | 42/0                               |
| Age (years)                                              | 43 ± 12                     | 40.5 ± 8.2                  | 57.8 ± 17.1                         | 59.7 ± 19.3                        |
| Sex ratio M/F                                            | 12/6                        | 17/3                        | 20/3                                | 28/14                              |
| COPD, n (%)                                              |                             |                             | 2 (9)                               | 4 (9)                              |
| Asthma, n (%)                                            | NA                          | NA                          | 3 (13)                              | 2 (5)                              |
| Smoker, n (%)                                            |                             |                             | 8 (35)                              | 17 (40)                            |
| Road traffic accident, n (%)                             |                             |                             | 19 (82)                             | 20 (48)                            |
| Number of broken ribs                                    | 8.2 ± 3                     | 4.4                         | 11.0 ± 3.1                          | 7.3 ± 2.8                          |
| Patients on mechanical ventilation before surgery, n (%) | 18 (100)                    | NA                          | 23 (100)                            | 6 (14)                             |
| Time from trauma to surgery, days                        | 1 week                      | 24-36 hours                 | In the 48 hours after randomization | 4.0 days [2-6]                     |
| Number of days on mechanical ventilation after surgery   | 2.5 ± 3.2                   | 2                           | NA                                  | 4.9 ± 11.5                         |
| Length of stay, days                                     |                             |                             |                                     |                                    |
| ICU                                                      | 16.5 ± 7.4                  | 9.6                         | 13.5 [9.9-15.8]                     | 6.50 [4.0-9.0]                     |
| Hospital                                                 | NA                          | 11.7                        | 20 [18-28]                          | 11.5 [9.0-16.0]                    |
| Postoperative pneumonia, n (%)                           | 4 (22)                      | 2 (10)                      | 11 (48)                             | 19 (45)                            |
| Tracheotomy, n (%)                                       | 3                           | NA                          | 9 (39)                              | 2 (5)                              |
| Mortality, n (%)                                         | 0 (0)                       | 2 (10)                      | 0 (0)                               | 2 (5)                              |

Abbreviations: COPD, Chronic Obstructive Pulmonary Disease; ICU, Intensive Care Unit; NA, Not Available
