# Supplementary material for: Surgical and perioperative management of flail chest with titanium plates: a French cohort series from a thoracic referral center
Source: PubMed Central journal article supplement (PMC9850677; doi:10.1186/s13019-023-02121-8), 2023-01-18
Supplement: 13019_2023_2121_MOESM3_ESM.pdf [file 13019_2023_2121_MOESM3_ESM.pdf]

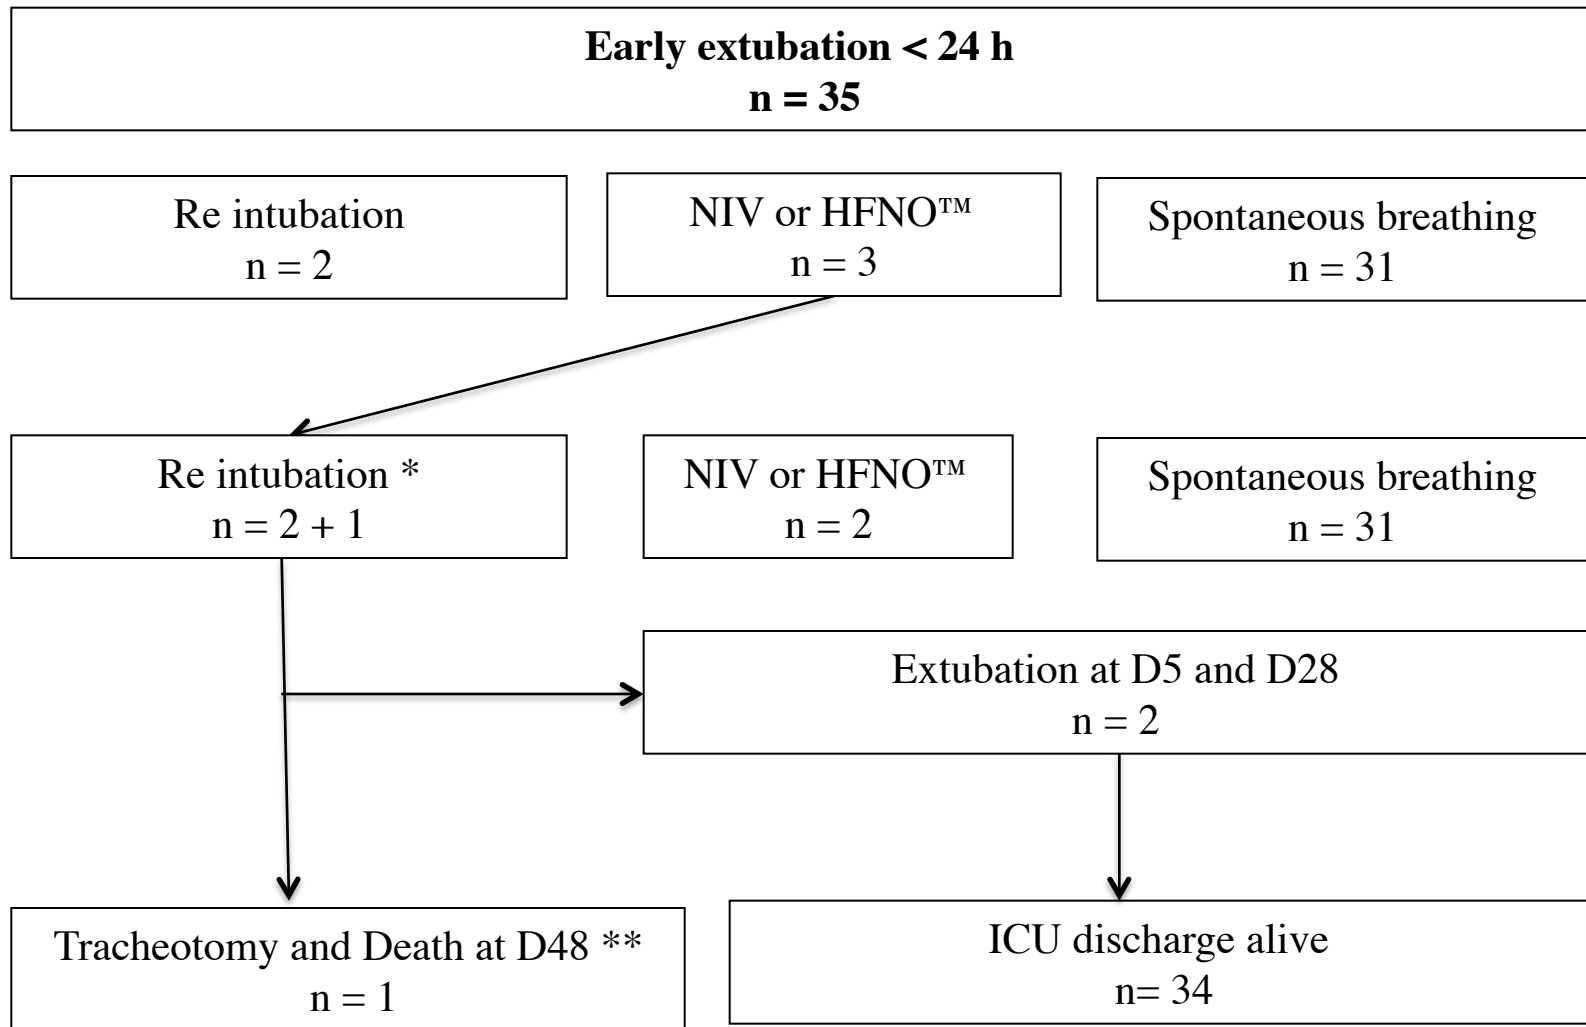

**NIV : non invasive ventilation, High flow nasal oxygen therapy (HFNO)**

\* *Two patients were reintubated within few hours of extubation due to hypercapnic respiratory distress and one after 48 hours of NIV*

\*\* *The death occurred 48 days after surgery, after a collegial and multidisciplinary decision to withdraw therapies.*
