# Supplementary material for: Surgical and perioperative management of flail chest with titanium plates: a French cohort series from a thoracic referral center
Source: PubMed Central journal article supplement (PMC9850677; doi:10.1186/s13019-023-02121-8), 2023-01-18
Supplement: 13019_2023_2121_MOESM4_ESM.pdf [file 13019_2023_2121_MOESM4_ESM.pdf]

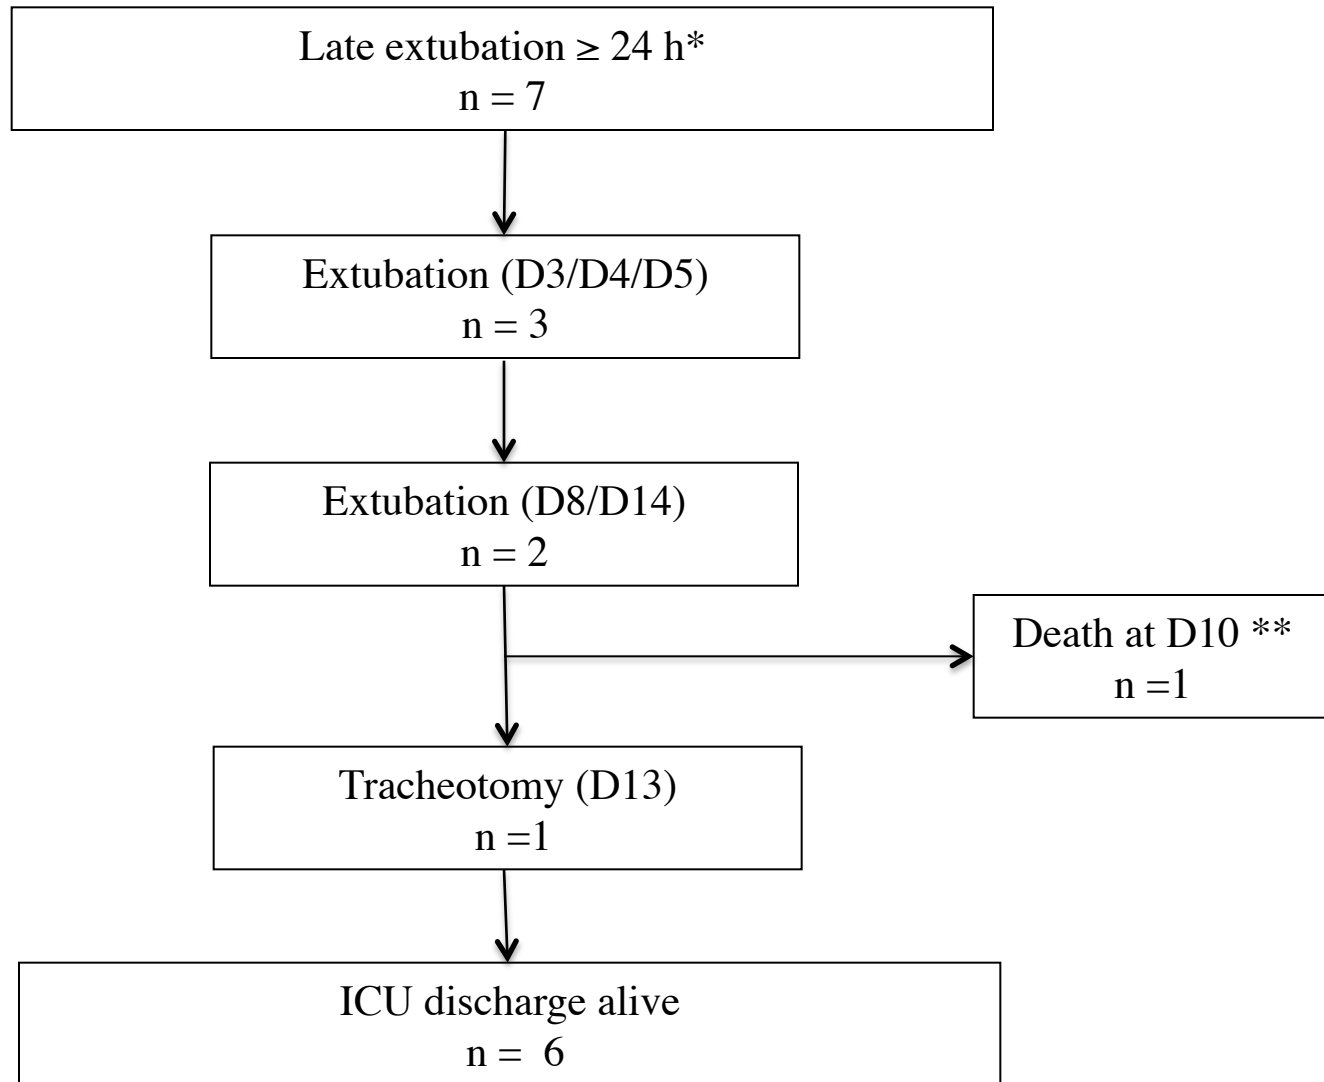

*\*The reasons for delayed extubation were hypoxemia related to ventilator-associated pneumonia (n=6) and poor ventilator mechanics and cough difficulty (n=1).*

*\*\*A cardiac arrest occurred 10 days after surgery, after 48 hours of extubation. The cause of death was unknown*
